# Supplementary material
Source: publisher site journal article supplement (https://www.dovepress.com/article/304066)
Supplement: Supplementary file 1 [file get_supplementary_file.php]

| **The Questionnaire** | |
| --- | --- |
| **Section 1**  **Characteristics of participant pharmacist** |  |
| 1. name |  |
| 1. sex |  |
| male |  |
| female |  |
| 1. region province city |  |
| | Central | | --- | | North | | East | | South | | Northwest | | Northeast | | Southwest | |  |
| 1. Are you a professional pharmacist? |  |
| Yes |  |
| No |  |
| 1. If you are a licensed pharmacist, how many years has it been since you obtained a licensed pharmacist certificate? |  |
| ＜5  6-10  11-15  ＞15 |  |
| 1. Work duration(Year) |  |
| ＜5 |  |
| 6-10 |  |
| 11-15 |  |
| 16-20 |  |
| ＞20 |  |
| 1. Weekly working hours |  |
| ＜6h |  |
| 8-24h |  |
| 25-40h |  |
| ＞41h |  |
| 1. major/Education level |  |
| Major:   | Pharmacy | | --- | | Clinical | | Nursing | | Traditional Chinese Medicine | | Other medicine related majors | |  |
| Educational level:  Specialist (college and secondary school)  Bachelor  Master（above） |  |
|  |
|  |
| 1. Average number of pharmacists in the pharmacy at any one shift |  |
| 0 |  |
| 1 |  |
| ＞1 |  |
| 1. Pharmacy practice setting: |  |
| Chain community pharmacy |  |
| Independent community pharmacy |  |
| Public healthcare ambulatory clinic pharmacy |  |
| Private healthcare ambulatory clinic pharmacy |  |
| Others |  |
| 1. Diabetes training and/or continuing professional education activities? |  |
| Yes |  |
| No |  |
| 1. Interest in receiving diabetes specific training and or continuing professional education activities in the future |  |
| Yes |  |
| No |  |
| 1. Approximate percentage of diabetic patients(%) |  |
| 0 |  |
| 10 |  |
| 25 |  |
| 50 |  |
| 75 |  |
| 100 |  |
| 1. Availability of anti-diabetic medications in the pharmacy |  |
| Yes |  |
| No |  |
| 1. Availability of diabetic supplies and/or supplements in the pharmacy |  |
| Yes |  |
| No |  |
| 1. Is there a patient file? |  |
| Yes |  |
| No |  |

| **Section 2**  **Understanding of diabetic care** | 0%  Never | 25%  Rarely | 75%  Often | 100%  Always |
| --- | --- | --- | --- | --- |
| 1. Counsel on the use of blood glucose meters including how to obtain a blood sample and how to interpret results |  |  |  |  |
| 1. Evaluate blood glucose log for values outside target range |  |  |  |  |
| 1. Counsel about signs, symptoms, causes and treatment of hypoglycemia |  |  |  |  |
| 1. Counsel on when to contact the healthcare provider |  |  |  |  |
| 1. Review the patient’s drug refll history to identify poor adherence |  |  |  |  |
| 1. Provide patient-specific interventions to help improve adherence |  |  |  |  |
| 1. Counsel on the appropriate handling and storage of insulin |  |  |  |  |
| 1. Counsel on the appropriate use of insulin pens, syringes, lancets and needles (e.g., sharp disposal) |  |  |  |  |
| 1. Counsel on how insulin works and the key diferences amongst insulin formulations |  |  |  |  |
| 1. Counsel on appropriate insulin administration (mixing insulin, injection technique, injection   time…) |  |  |  |  |
| 1. Describe the appropriate time to administer each oral anti-diabetic drug |  |  |  |  |
| 1. Counsel about the side efects of oral anti-diabetic drugs |  |  |  |  |
| 1. Counsel on current recommendations for antiplatelet therapy (e.g., low dose Aspirin) |  |  |  |  |
| 1. Provide education on the importance of controlling blood pressure in diabetes |  |  |  |  |
| 1. Discuss the importance of self-testing of blood glucose levels |  |  |  |  |
| 1. Counsel on the current treatment targets for cholesterol in diabetes |  |  |  |  |
| 1. Provide education on the importance of regular screening for retinopathy |  |  |  |  |
| 1. Provide education on the importance of regular screening for nephropathy |  |  |  |  |
| 1. Provide education on the importance of regular screening for neuropathic pain |  |  |  |  |
| 1. Counsel on good foot care techniques |  |  |  |  |
| 1. Provide education about the importance of immunization for influenza and pneumococcal pneumonia |  |  |  |  |
| 1. Stress the importance of weight control in diabetes management where applicable |  |  |  |  |
| 1. Stress the importance of diet and regular exercise in diabetes management |  |  |  |  |
| Note:  Never: this service is not provided to patients with diabetes. Rarely: this service is provided to about 25% of patients with diabetes. Often: this service is provided to about 75% of patients with diabetes. Always: this service is provided to about 100% of patients with diabetes | | | | |

| **Section 3**  **Perceived barriers for providing diabetic care services** | Strongly agree | Agree | Neutral | Disagree | Strongly disagree |
| --- | --- | --- | --- | --- | --- |
| Providing chronic management service is not the main KPI of pharmacists |  |  |  |  |  |
| I do not have enough time |  |  |  |  |  |
| Shortage of personnel |  |  |  |  |  |
| I do not have a private counselling area |  |  |  |  |  |
| Low patient expectations regarding pharmacists role in diabetes care |  |  |  |  |  |
| Lack of diabetes related educational materials in the pharmacy |  |  |  |  |  |
| Lack of access to patients medical profles |  |  |  |  |  |
| Lack of diabetes therapeutic knowledge and skills |  |  |  |  |  |
| Limited funding |  |  |  |  |  |
| Cultural or religious barriers |  |  |  |  |  |
| Lack of diabetic patients visiting the pharmacy |  |  |  |  |  |
| I am not interested in providing diabetes care |  |  |  |  |  |
| Language barrier |  |  |  |  |  |
| Lack of diabetes training programs for pharmacists |  |  |  |  |  |
| Low patient knowledge about diabetes management |  |  |  |  |  |

| **Section 4**  **Attitude towards diabetic care** | Strongly agree | Agree | Neutral | Disagree | Strongly disagree |
| --- | --- | --- | --- | --- | --- |
| I think the practice of diabetic care is valuable. All patients should be performed pharmaceutical care |  |  |  |  |  |
| Primary responsibility of pharmacists should be to prevent and solve medication-related problems and complications. |  |  |  |  |  |
| Providing diabetic care takes too much time and effort |  |  |  |  |  |
| Diabetic care is an extension of the community pharmacy services |  |  |  |  |  |
| Do you feel that conducting these eye or foot screenings is a task you would be willing to complete on a routine basis? |  |  |  |  |  |
| Do you think the technology is useful to the patients at this pharmacy? |  |  |  |  |  |
| What positive aspects, if any, have you noticed about offering this screening in the pharmacy? |  |  |  |  |  |
| What negative aspects, if any, have you noticed about offering this screening in the pharmacy? |  |  |  |  |  |
| Pharmaceutical care will increase the patient’s appreciation of the pharmacist’s value and image |  |  |  |  |  |
| There are no economic benefits to be gained from implementation of pharmaceutical care |  |  |  |  |  |
